# Supplementary material for: Cyanogenesis in the Sorghum Genus: From Genotype to Phenotype
Source: MDPI journal article supplement (doi:10.3390/genes13010140), 2022-01-14
Supplement: s1 [file s1]

# Cyanogenesis in the *Sorghum* genus: from genotype to phenotype

Max Cowan <sup>1,5</sup>, Birger Lindberg Møller <sup>2</sup>, Sally Norton <sup>3</sup>, Camilla Knudsen <sup>2</sup>, Christoph Crocoll <sup>2</sup>, Agnelo Furtado <sup>4</sup>, Robert Henry <sup>4</sup>, Cecilia Blomstedt <sup>1</sup> and Ros Gleadow <sup>1,4\*</sup>

<sup>1</sup> School of Biological Sciences, Monash University, Clayton, Vic 3800 Australia;

<sup>2</sup> Plant Biochemistry Laboratory, Department of Plant and Environmental Sciences, University of Copenhagen, Denmark;

<sup>3</sup> Australian Grains Genebank, Agriculture Victoria, Horsham, Australia;

<sup>4</sup> Queensland Alliance for Agriculture and Food Innovation, The University of Queensland, St Lucia, QLD, Australia;

<sup>5</sup> Current address: Queensland Alliance for Agriculture and Food Innovation, The University of Queensland, Nambour, QLD, Australia max.cowan@uq.edu.au

**Supplementary Figure S1** CLUSTAL O (1.2.4) multiple sequence alignment of the amino acid sequences of CYP79A1 obtained by PCR from wild sorghum species.

**Table S1:** Accession and provenance details of the sorghum crop wild relatives.

**Table S2:** Genes selected for variant analysis.

**Table S3:** Sequence of the primers used to amplify CYP79A1 from the wild sorghum species.

## Supplementary References

## Supplementary Figure S1

CLUSTAL O (1.2.4) multiple sequence alignment of the amino acid sequences of CYP79A1 obtained by PCR from wild sorghum species.

Highlighted in blue are amino acids identified as important for function as determined using EMS mutant plants showing reduced HCnp. P414L and C493Y results in acyanogenic plants [1,2].

Yellow Highlighted regions are motifs shown to be important by modelling and experimental analysis [3,4]. E408, R411 and R460 form the E-R-R triad which is key to docking of the substrate tyrosine.

| Transmembrane region                               |                                                              |                               |
|----------------------------------------------------|--------------------------------------------------------------|-------------------------------|
| brachypodum                                        | MATKEVEAAAATVLAAPLLSTSTILKLLLFVVTL                           | SYLARALSRPRKTTTKCSSS--A--- 55 |
| plumosum                                           | MATNEVEAAAATVLAAPLLSTSTILKLLLSVVAL                           | SYLARALSRPRKTTTKCSS-TTS--- 56 |
| interjectum                                        | MATMEVEAAAATVLAAPLLSTSTILKLLLFVVTL                           | SYLARALSRPRKTTTKCGS-TTS--- 56 |
| amplum                                             | MATMEVEAAAATVLDAPLLSTSTILKLLLFVGT                            | SYLARALSRPRKTTTKCSS-TTS--- 56 |
| bulbosum                                           | MATMEVEAAAATVLGAPLLSTSTILKLLLFVVTL                           | SYLARALSRPRKTTTKCSSSTTS--- 57 |
| purpureosericeum                                   | MATKEVEAAAATVLAAPLLSTSAILKLLLFVVTL                           | SYLARALRRPRKTTTN-----KCS-- 53 |
| versicolor                                         | MATMEVEAAAATVLAAPLLSTSAILKLLLFVVTL                           | SYLARALSRPRKTTTKCSSTTSSG-- 58 |
| bicolor                                            | MATMEVEAAAATVLAAPLLSSSAILKLLLFVVTL                           | SYLARALRRPRKSTTKCSSTTCASPP 60 |
| laxiflorum                                         | MATMEVDAAAATVLAAPLLSSSAILKLLLFVVTL                           | SYLARALSRPRKTSTKCSSTTCASP- 59 |
| angustum                                           | MATMEVDAAAGATVLAAPLLSSSAILKLLLVVAT                           | SYLSRALIRPRKTTTKCSSTT----- 55 |
| ecarinatum                                         | MATMEVEAAAATVLAAPLLSSSAILKLLLVVAT                            | SYLSRALIRPRKTTTKCSSTT----- 55 |
| intrans                                            | MATMEVEAAAATVLAAPLLSSSAILKLLLFVAT                            | SYLSRALIRPRKTTTKCGSTT----- 55 |
| *** **:**.**. * ****:*.***** * ::***:*** *****:.*: |                                                              |                               |
| brachypodum                                        | GVGSNPALPPGPVWPWPIVGNLPEMLMNKPAFRWIHQMMREMGT                 | DIACVKLGGIHVVSITC 115         |
| plumosum                                           | GVGSNPALPPGPVWPWPIVGNLPEMVINKPAFRWIHQMMREMGT                 | DIACVKLGGIHVVSITC 116         |
| interjectum                                        | CVGSNPPLPPGPVWPWPIVGNLPEMLINKPAFRWIHQMMREMGT                 | DIACVKLGGIHVVSITC 116         |
| amplum                                             | CVGSNPALPPGPVWPWPIVGNLPEMLINKPAFRWIHQMMREMGT                 | DIACVKLGGIHVVSITC 116         |
| bulbosum                                           | CVGSNPALPPGPVWPWPIVGNLPEMLINKPAFRWIHQMMREMGT                 | DIACVKLGGIHVVSITC 117         |
| purpureosericeum                                   | -VGSNPPLPPGPVWPWPIVGNLPEMLLNKPAFRWIHQMMRDMGT                 | DIACVKLGGIHVVSITC 112         |
| versicolor                                         | -VGSNPPLPPGPVWPWPVGNLPEMLLNKPAFRWIHQIMRDMGT                  | DIACVKLGVIHVVSITC 117         |
| bicolor                                            | AGVGNPPLPPGPVWPWPVGNLPEMLLNKPAFRWIHQMMREMGT                  | DIACVKLGVIHVVSITC 120         |
| laxiflorum                                         | -GVGNPPLPPGPVWPWPVGNLPEMLLNKPAFRWIHQMMHEMGT                  | DIACVKLGVIHVVSITC 118         |
| angustum                                           | -GVGNLPLPPGPAPWPWPVGNLPEMLLNKPAFRWIHQMMSEMGT                 | GIACVKLGDVHVVCVTC 114         |
| ecarinatum                                         | -GVGNLPLPPGPAPWPWPVGNLPEMLLNKPAFRWIHQMMSEMGT                 | MACVKLGDVHVVCVTC 114          |
| intrans                                            | -GVGNLPLPPGPAPWPWPVGNLPEMLLNKPAFRWIHQMMSEMGT                 | DIACVKLGAVHVVCVTC 114         |
| .* *****.***:*****:.*:*****:***.***:***            |                                                              |                               |
| E145 R152 Heme binding                             |                                                              |                               |
| brachypodum                                        | PEMAREVLRKQDANFISRPLTFASETFSGGYRNAVLSPYGDQWKKMRRVLTSEIICPSRH | 175                           |
| plumosum                                           | PEIAREVLRKQDANFISRPLTFASETFSGGYRNAVLSPYGDQWKKMRRVLTSEIICPSRH | 176                           |
| interjectum                                        | PEMAREVLRKQDANFVSRPLTFASETFSGGYRNAVLSPYGDQWKKMRRVLTSEIICPSRH | 176                           |
| amplum                                             | PEIAREVLRKQDANFTSRPLTFASETFSGGYRNAVLSPYGDQWKKMRRVLTSEIICPSRH | 176                           |
| bulbosum                                           | PEIAREVLRKQDANFISRPLTFASETFSGGYRNAVLSPYGDQWKKMRRVLTSEIICPSRH | 177                           |

|                  |                                                              |           |
|------------------|--------------------------------------------------------------|-----------|
| purpureosericeum | PEIAREVLRKQDANFISRPLTFASETFSGGYRNAVLSPYGDQWKKMRRVLTSEIICPSRH | 172       |
| versicolor       | PEIAREVLRKQDANFISRPLTFASETFSGGYRNAVLSPYGDQWKKMRRVLTSEIICPSRH | 177       |
| bicolor          | PEIAREVLRKQDANFISRPLTFASETFSGGYRNAVLSPYGDQWKKMRRVLTSEIICPSRH | 180       |
| laxiflorum       | PEIAREVLRKQDANFISRPLTFASEMFSGGYRNAVLSPYGDQWKKMRRVLTSEIICPSRH | 178       |
| angustum         | PEIAREVLRKQDANFISRPLTFASETFSGGYRNAVLSPYGAQWKKMRRVLTSEIICPPRH | 174       |
| ecarinatum       | PEIAREVLRKQDANFISRPLTFASETFSGGYRNAVLSPYGAQWKKMRRVLTSEIICPSRH | 174       |
| intrans          | PEIAREVLRKQDANFISRPLTFASETFSGGYRNAVLSPYGAQWKKMRRVLTSEIICPSRH | 174       |
|                  | ** :***** ***** ***** ***** ***** **                         |           |
| brachypodium     | AWLHDKRADEADNLTRYVYNLATKAA-AGDDAVVDVRHVARHYCGNVIRRLMFNRRYFGE | 234       |
| plumosum         | AWLHDKRADEADNLTRYVYNLATKAAAAGDDVVDVRHVARHYCGNVIRRLMFNRRYFGE  | 236       |
| interjectum      | AWLHDKRADEADNLTRYVYNLATKAA-AGDDVVVDVRHVARHYCGNVIRRLMFNRRYLGE | 235       |
| amplum           | AWLHDKRADEADNLTRYVYNLATKAA-AAAGDVVDVRHAARHYCGNVIRRLMFNRRYFGE | 235       |
| bulbosum         | AWLHDKRADEADNLTRYVYNLATKAA-AAGDDVVDVRHVARHYCGNVIRRLMFNRRYFGE | 236       |
| purpureosericeum | AWLHDKRTDEADNLTRYVYNLATTKA-TGRDDVVDVRHVARHYCGNVIRRLMFNRRYFGE | 231       |
| versicolor       | AWLHDKRTDEADNLTRYVYNLATTKA-TGG-DVVDVRHVARHYCGNVIRRLMFNKRYFGE | 235       |
| bicolor          | AWLHDKRTDEADNLTRYVYNLATKAA-T-GDVAVDVRHVARHYCGNVIRRLMFNRRYFGE | 238       |
| laxiflorum       | AWLHDKRTDEADNLTRYIYNLATKSA-G---DVVDVRHVARHYCGNVIRRLMFNRRYFGE | 234       |
| angustum         | VWLHDKRSDEADNLTRYVYNLAT-GA--AGGNVVDVRHIARHYCGNVIRRLMFNKRYFGE | 231       |
| ecarinatum       | VWLHDKRADEADNLTRYVYNLATTRA--AGGNVVDVRHIARHYCGNVIRRLMFNKRYFGE | 232       |
| intrans          | AWLHDKRADEADNLTRYVYNLATTRA--AGGNVVDVRHIARHYCGNVIRRLMFNKRYFGE | 232       |
|                  | .*****:*****:***** * .***** *****:***:**                     |           |
| brachypodium     | PQPDGGPGPMEELHMDAVFTSLGLLYAFCVSDYLPWLRGLDLDGHEKIVKEANQTVNRLH | 294       |
| plumosum         | PQPDGGPGPMEELHMDAVFTSLGLLYAFCVSDYLPWLRGLDLDGHEKIVKQANETVNRLH | 296       |
| interjectum      | PQPDGGPGPMEELHMDAVFTSLGLLYAFCVSDYLPWLRGLDLDGHEKIVKEANETVNRLH | 295       |
| amplum           | PQPDGGPGPMEELHMDAVFTSLGLLYAFCVSDYLPWLRGLDLDGHEKIVKEANETVNRLH | 295       |
| bulbosum         | PQPDGGPGPTEELHMDAVFTSLGLLYAFCVSDYLPWLRGLDLDGHERIVKEANETVNRLH | 296       |
| purpureosericeum | PQPDGGPGPMEELHMDAVFTSLGLLYAFCVSDYLPWLRGLDLDGHEKIVKEANETVNRLH | 291       |
| versicolor       | PQPDGGPGPMEVLHMDAVFTSLGLLYAFCVSDYLPWLRGLDLDGHEKIVKEANAAVNRLH | 295       |
| bicolor          | PQADGGPGPMEVLHMDAVFTSLGLLYAFCVSDYLPWLRGLDLDGHEKIVKEANVAVNRLH | 298       |
| laxiflorum       | PQPDGGPGPMEVLHMDAVFTSLGLLYAFCVSDYLPWLRGLDLDGHEKIVKEANEAVNRLH | 294       |
| angustum         | PQPDGGPGPMEVLHMDAVFTSLGLLYAFCISDYLPWLRGLDLDGHERMVKEANETVNRLH | 291       |
| ecarinatum       | PQPDGGPGPMEVLHMDAVFTSLGLLYAFCISDYLPWLRGLDLDGHEKIVKEANETVNRLH | 292       |
| intrans          | PQPDGGPGPMEVLHMDAVFTSLGFLYAFCISDYLPWLRGLDLDGHEKIVKEANETVNRLH | 292       |
|                  | ** ***** * *****:*****:*****:***:** :*****                   |           |
|                  | D347                                                         | D354 N355 |
| brachypodium     | DTVIDGRWRQWKSGERKEMEDFLDVLITLKDAQGNPLLTIEEVKAQSQDITFAAVDNPSN | 354       |
| plumosum         | DAVIDDRWRQWKSGERKEMEDFLDVLITLKDAQGNPLLTIEEVKAQSQDITFAAVDNPSN | 356       |
| interjectum      | DAVIDDRWRQWKSGERKEMEDFLDVLITLKMAQGNPLLTIEEVKAQSQDITFAAVDNPSN | 355       |
| amplum           | DAVIDDRWRQWKSGERKEMEDFLDVLITLKDAQGNPLLTIEEVKAQSQDITFAAVDNPSN | 355       |
| bulbosum         | DTVIDDRWRQWKSGERKEMEDFLDVLITLKDAQGNPLLTIEEVKAQSQDITFAAVDNPSN | 356       |

\* \* \* \* \*

**E408 R411 P414**

\* \* \* \* . \* \* \* \* . \* \* \* . \* \* \* \* \* \* \* \* \* \* . \* \* \* \* \* \* \* \* \* \* \* \* \* \* \* \* \* \* \* \* \* \* \* \*

### PERF domain - R460

\* \* \* . \* \* \*   \* \* \* \* \*   . . \* \*   \* \* . \* \* \* \* \* . \* \* \*   \* \* \* . \* \* \* \* \* \* \*   . . .   . \* \*   .

## C493

|                  |                                                                        |     |
|------------------|------------------------------------------------------------------------|-----|
| brachypodium     | NDLRFISFSTGRRG <b>C</b> IAASLGTAMNIMLFGRLLQGFTWSKPAGVEAVDLSESKSDTFMAT  | 533 |
| plumosum         | NDLRFISFSTGRRG <b>C</b> IAASLGTAMSIMLFGRLQLQGFTWSKPAGVEAVDLSESKSDTFMAT | 535 |
| interjectum      | NDLRFISFSTGRRG <b>C</b> IAASLGTAMSIMLFGRLQLQGFTWSKPAGVEAVDLSESKSDTFMAT | 534 |
| amplum           | NDLRFISFSTGRRG <b>C</b> IAASLGTAMSIMLFSRLLQGFTWSKPAGVEAVDLSESKSDTFMAT  | 534 |
| bulbosum         | NDLRFISFSTGRRG <b>C</b> IAASLGTAMSIMLFGRLQLQGFTWSKPAGVEAVDLSESKSDTFMAT | 535 |
| purpureosericeum | NDLRFISFSTGRRG <b>C</b> IAASLGTAMSIMLFGRLQLGFAWSKPAGVEAVDLSESKSDTFMAT  | 529 |
| versicolor       | NDLRFISFSTGRRG <b>C</b> IAASLGTAMSIMLFGRLQLQGFTWSKPAGVEAVDLSESKSDTFMAT | 533 |
| bicolor          | NDLRFISFSTGRRG <b>C</b> IAASLGTAMSVMLFGRLQLQGFTWSKPAGVEAVDLSESKSDTFMAT | 538 |
| laxiflorum       | NDLRFISFSTGRRG <b>C</b> IAASLGTAMSIMLFGRLQLQGFTWSKPAGVEAVDLSESKSDTFMAT | 533 |
| angustum         | KDLRFISFSTGRRG <b>C</b> IAASLGTMTSIMLFGRLQLQGFTWSKPAGVEAVDLSECKNTTFMAT | 530 |
| ecarinatum       | NDLRFISFSTGRRG <b>C</b> IAASLGTAMSIMLFGRLQLQGFTWSKPAGVEAVDLSESKNDTFMAT | 531 |
| intrans          | NDLRFISFSTGRRG <b>C</b> IAASLGTMTSIMLFGRLQLQGFTWSKPAGVEAVDLSESKNGTFMAT | 531 |

:\*\*\*\*\* \*\*\*\*\*:\*.:\*\*\*.\*\*\*\*\*:\*\*\*\*\*.\*\*\*\*\*.\*. \*\*\*\*\*

|                  |                          |     |
|------------------|--------------------------|-----|
| brachypodium     | PLVLHAEPRLPAPHLIPTISV--- | 553 |
| plumosum         | PLALHAEPRLPAPHLIPSISI--- | 555 |
| interjectum      | PLVLHAQPRLPAPHLIPSISI--- | 554 |
| amplum           | PLVLHAEPRLPAPHLIPSFSI--- | 554 |
| bulbosum         | PLVLHAEPRLPAPHLIPSISII-- | 556 |
| purpureosericeum | PLVLRAEPRLPAPHLIPSFSI--- | 549 |
| versicolor       | PLVLRAEPRLPAPHLIPSISI--- | 553 |
| bicolor          | PLVLHAEPRLPAPHLIPSISI--- | 558 |
| laxiflorum       | PLVLNAEPRLPAPHLIPAISI--- | 553 |
| angustum         | PLALNAVPRLPVHLIPSISI---  | 550 |
| ecarinatum       | PLALNAEPRLLVHLIPSFSI---  | 551 |
| intrans          | PLALNAEPRLPVHLIPAISPSPSD | 554 |

\*\*.\*.\* \*\*\* .:\*\*\*:.\*

**Table S1:** Accession and provenance details of the sorghum crop wild relatives examined in the current study. Seeds were obtained from the Australian Grains Genebank (AGG), Horsham, Victoria (Coordinator: Dr Sally Norton).\*denotes species of the *Eusorghum* subgenus.

| Species                    | Accession number | Provenance             | Latitude | Longitude |
|----------------------------|------------------|------------------------|----------|-----------|
| <b>HCN analysis</b>        |                  |                        |          |           |
| <i>S. amplum</i>           | 302623           | Kimberley, WA          | -14.5982 | 125.7928  |
| <i>S. angustum</i>         | 302596           | Central Highlands, QLD | -13.4583 | 142.9613  |
| <i>S. brachypodium</i>     | 302670           | Kakadu, NT             | -12.5667 | -132.8833 |
| <i>S. bulbosum</i>         | 302645           | Kimberley, WA          | -16.0965 | 128.39    |
| <i>S. ecarinatum</i>       | 302656           | Kimberley, WA          | -17.1838 | 124.9158  |
| <i>S. exstans</i>          | 302577           | Melville Island, NT    | -11.6403 | 130.6317  |
| <i>S. interjectum</i>      | 302428           | Kimberley, WA          | -15.7695 | 128.6462  |
| <i>S. intrans</i>          | 302394           | Katherine, NT          | -14.4503 | 132.2432  |
| <i>S. laxiflorum</i>       | 302525           | Katherine, NT          | -16.6477 | 135.8495  |
| <i>S. leiocladum</i>       | 300170           | New England, NSW       | -28.9263 | 152.3453  |
| <i>S. macrospermum</i>     | 302367           | Katherine, NT          | -14.4097 | 132.1977  |
| <i>S. matarankense</i>     | 302521           | Katherine, NT          | -16.0797 | 136.3077  |
| <i>S. plumosum</i>         | 302415           | Katherine, NT          | -14.7922 | 131.9427  |
| <i>S. propinquum</i> *     | 302546           | NA                     | NA       | NA        |
| <i>S. purpureosericeum</i> | 318068           | NA                     | NA       | NA        |
| <i>S. stipoidum</i>        | 302442           | Kimberley, WA          | -18.0412 | 127.8037  |
| <i>S. timorensis</i>       | 302660           | Kimberley, WA          | -17.3657 | 124.2937  |
| <i>S. versicolor</i>       | 321128           | Usagara, Tanzania      | NA       | NA        |
| <i>S. halepense</i> *      | 300167           | Western Downs, QLD     | -28      | 152       |
| <i>S. × alnum</i> *        | 316842           | Central Highlands, QLD | -24.1187 | 148.0901  |
| <b>Illumina sequencing</b> |                  |                        |          |           |
| <i>S. brachypodium</i>     | 302481           | Arnhem Land, NT        | -12.6767 | 132.8435  |
| <i>S. laxiflorum</i>       | 302525           | NT                     | -16.6477 | 135.8495  |
| <i>S. leiocladum</i>       | 300148           | Maidenwell, QLD        | -26      | 151       |
| <i>S. macrospermum</i>     | 302367           | Katherine, NT          | -14.4097 | 132.1977  |
| <i>S. matarankense</i>     | 302521           | Booraloola, NT         | -16.0797 | 136.3077  |
| <i>S. purpureosericeum</i> | 318068           | NA                     | NA       | NA        |
| <b>PCR</b>                 |                  |                        |          |           |
| <i>S. amplum</i>           | 302455           | WA                     | -15.977  | 128.9632  |
| <i>S. angustum</i>         | 302588           | QLD                    | -15.308  | 144.8133  |
| <i>S. brachypodium</i>     | 302480           | Arnhem Land, NT        | -12.7145 | 132.4167  |
| <i>S. bulbosum</i>         | 302417           | Katherine, NT          | -15.1425 | 131.6812  |
| <i>S. ecarinatum</i>       | 302581           | Katherine, NT          | -14.4393 | 132.2755  |
| <i>S. exstans</i>          | 302401           | Katherine, NT          | -14.553  | 133.0117  |
| <i>S. interjectum</i>      | 302569           | Nhulunbuy, NT          | -12.7758 | 136.23    |
| <i>S. intrans</i>          | 302389           | NT                     | -13.5838 | 131.4568  |
| <i>S. laxiflorum</i>       | 302503           | QLD                    | -17.8917 | 139.2853  |
| <i>S. leiocladum</i>       | 300148           | Maidenwell, QLD        | -26      | 151       |
| <i>S. macrospermum</i>     | 322277           | Katherine, NT          | NA       | NA        |
| <i>S. matarankense</i>     | 302521           | Booraloola, NT         | -16.0797 | 136.3077  |
| <i>S. plumosum</i>         | 322440           | QLD                    | -20.8777 | 144.51245 |
| <i>S. purpureosericeum</i> | 321133           | NA                     | NA       | NA        |
| <i>S. stipoidum</i>        | 302449           | Kimberley, WA          | -18.0043 | 125.2893  |
| <i>S. timorensis</i>       | 302634           | Cloncurry, QLD         | -20.6457 | 141.0265  |
| <i>S. versicolor</i>       | 321127           | NA                     | NA       | NA        |

**Table S2:** Genes selected for variant analysis. Enzyme family, identification, function, and reference information for the genes examined in this study involved in dhurrin biosynthesis, bioactivation, recycling and transport. In addition, two genes were selected that are putatively involved in ethylene synthesis and tyrosine biosynthesis.

| Enzyme                         | Gene           | Gene ID          | Function                           | Reference |
|--------------------------------|----------------|------------------|------------------------------------|-----------|
| Cytochrome P450                | <i>CYP79A1</i> | Sobic.001G012300 | Biosynthesis                       | [5]       |
| Cytochrome P450                | <i>CYP71E1</i> | Sobic.001G012200 |                                    | [5]       |
| UDP-glucosyltransferase        | <i>UGT85B1</i> | Sobic.001G012400 |                                    | [5]       |
| Cytochrome P450 reductase      | <i>POR</i>     | Sobic.002G295100 |                                    | [5]       |
| MATE transporter               | <i>MATE</i>    | Sobic.001G012600 | Transport                          | [6]       |
| $\alpha$ -hydroxynitrile lyase | <i>HNL</i>     | Sobic.004G335500 | Bioactivation                      | [5]       |
| $\beta$ -glucosidase           | <i>DHR1</i>    | Sobic.008G079800 |                                    | [7]       |
| $\beta$ -glucosidase           | <i>DHR2</i>    | Sobic.008G080400 |                                    | [7]       |
| $\beta$ -cyanoalanine synthase | <i>BCAS</i>    | Sobic.006G016900 | HCN detoxification                 | [5]       |
| $\beta$ -cyanoalanine synthase | <i>CAS26</i>   | Sobic.003G333700 |                                    | [8]       |
| Nitrilase                      | <i>NIT4A</i>   | Sobic.004G225200 | HCN detoxification,<br>N recycling | [5]       |
| Nitrilase                      | <i>NIT4B1</i>  | Sobic.004G225000 |                                    | [5]       |
| Nitrilase                      | <i>NIT4B2</i>  | Sobic.004G225100 |                                    | [5]       |
| Glutathione S-transferase      | <i>GST1</i>    | Sobic.001G012500 | N recycling                        | [5,7,9]   |
| Glutathione S-transferase      | <i>GST1B</i>   | Sobic.001G065800 |                                    | [5]       |
| Glutathione S-transferase      | <i>GST3</i>    | Sobic.003G416300 |                                    | NA        |
| ACC oxidase                    | <i>ACC</i>     | Sobic.003G197200 | Ethylene synthesis                 |           |
| Chorismate mutase              | <i>CM7</i>     | Sobic.007G141500 | Tyrosine synthesis                 | NA        |

**Table S3:** Details of the primers used to amplify and sequence *CYP79A1* from the wild sorghum species.

| Primer name          | Sequence                    | Tm (°C) | Application        |
|----------------------|-----------------------------|---------|--------------------|
| CYP79A1 coding For   | 5' GGCGACAATGGAGGTAGAGG 3'  | 66      | PCR and sequencing |
| CYP79A1 coding Rev   | 5' GATGGAGATGGACGGGTAGAG 3' | 65      |                    |
| CYP79A1 Int Rev 5' 1 | 5' ATTAATTACCTGTGACTGCGC 3' | 61      | sequencing         |
| CYP79A1 Int Rev 5' 2 | 5' CGCATCTTCTTCCACTGGTC 3'  | 65      | sequencing         |
| CYP79A1 Int For 3' 1 | 5' CTCCTGGATGTGCTCATCAC 3'  | 65      | sequencing         |
| CYP79A1 Int For 3' 2 | 5' GCGAAGGCGATGGAGGAG 3'    | 68      | sequencing         |

## Supplementary References

- Blomstedt, C.K.; Gleadow, R.M.; O'Donnell, N.; Naur, P.; Jensen, K.; Laursen, T.; Olsen, C.E.; Stuart, P.; Hamill, J.D.; Möller, B.L., et al. A combined biochemical screen and TILLING approach identifies mutations in *Sorghum bicolor* L. Moench resulting in acyanogenic forage production. *Plant Biotechnology Journal* **2012**, *10*, 54–66, doi:10.1111/j.1467-7652.2011.00646.x.
- Skelton, J.L. EMS induced mutations in dhurrin metabolism and their impacts on sorghum growth and development. Purdue University, West Lafayette, Indiana, 2014.

3. Hasemann, C.A.; Kurumbail, R.G.; Boddupalli, S.S.; Peterson, J.A.; Deisenhofer, J. Structure and function of cytochromes P450: a comparative analysis of three crystal structures. *Structure* **1995**, *3*, 41–62.
4. Vazquez-Albacete, D.; Montefiori, M.; Kol, S.; Motawia, M.S.; Møller, B.L.; Olsen, L.; Nørholm, M.H.H. The CYP79A1 catalyzed conversion of tyrosine to (E)-p-hydroxyphenylacetaldoxime unravelled using an improved method for homology modeling. *Phytochemistry* **2017**, *135*, 8–17, <http://doi.org/10.1016/j.phytochem.2016.11.013>.
5. Nielsen, L.J.; Stuart, P.; Pičmanová, M.; Rasmussen, S.; Olsen, C.E.; Harholt, J.; Møller, B.L.; Bjarnholt, N. Dhurrin metabolism in the developing grain of *Sorghum bicolor* (L.) Moench investigated by metabolite profiling and novel clustering analyses of time-resolved transcriptomic data. *BMC Genomics* **2016**, *17*, 1021.
6. Darbani, B.; Motawia, M.S.; Olsen, C.E.; Nour-Eldin, H.H.; Møller, B.L.; Rook, F. The biosynthetic gene cluster for the cyanogenic glucoside dhurrin in *Sorghum bicolor* contains its co-expressed vacuolar MATE transporter. *Scientific reports* **2016**, *6*, 37079, doi:10.1038/srep37079.
7. Hayes, C.M.; Burow, G.B.; Brown, P.J.; Thurber, C.; Xin, Z.; Burke, J.J. Natural Variation in Synthesis and Catabolism Genes Influences Dhurrin Content in Sorghum. *The Plant Genome* **2015**, *8*, doi:10.3835/plantgenome2014.09.0048.
8. Akbudak, M.A.; Filiz, E.; Uylas, S. Identification of O-acetylserine(thiol)lyase (OASTL) genes in sorghum (*Sorghum bicolor*) and gene expression analysis under cadmium stress. *Molecular biology reports* **2019**, *46*, 343–354, doi:10.1007/s11033-018-4477-0.
9. Bjarnholt, N.; Neilson, E.H.J.; Crocoll, C.; Jorgensen, K.; Motawia, M.S.; Olsen, C.E.; Dixon, D.P.; Edwards, R.; Møller, B.L. Glutathione transferases catalyze recycling of auto-toxic cyanogenic glucosides in sorghum. *The Plant journal : for cell and molecular biology* **2018**, *94*, 1109–1125, doi:10.1111/tjp.13923.
